# Supplementary material for: Probing CH-π(alkyne) interactions in a series of ethynylferrocenes
Source: Royal Society of Chemistry journal article supplement (doi:10.1039/c2ce25267h), 2012-01-01
Supplement: c2ce25267h.pdf [file c2ce25267h.pdf]

## ESI Fig.s 1-10

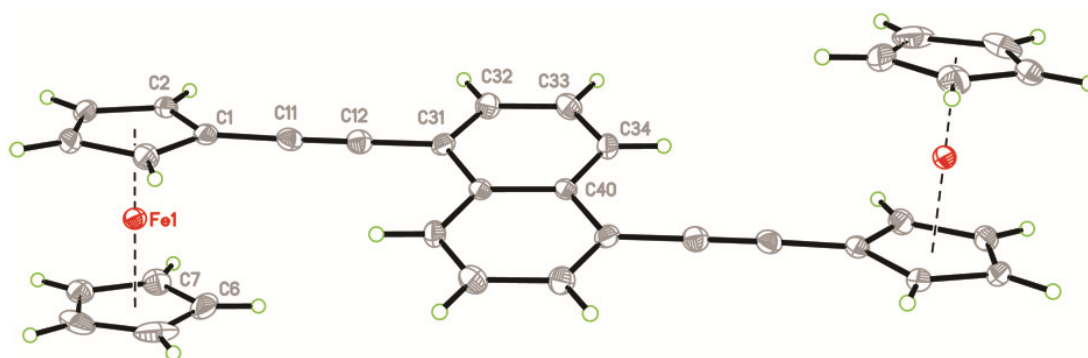

**ESI Fig. 1** Structure of the dimorph of 1,5-bis(ferrocenylethynyl)naphthalene **IIIb** drawn with 50% probability ellipsoids and showing the atomic labelling schemes. For clarity only the first two C atoms of the consecutively numbered cyclopentadienyl rings have been labelled.

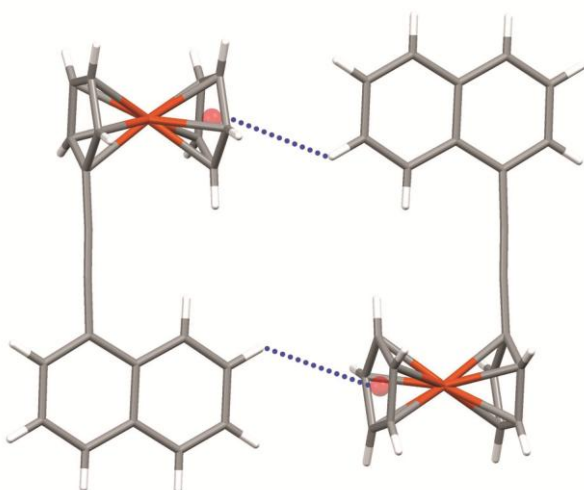

**ESI Fig. 2** Second inversion dimer motif of **I** showing EF CH $\cdots$  $\pi$  from H(37) to Cg2 (3.103 Å).

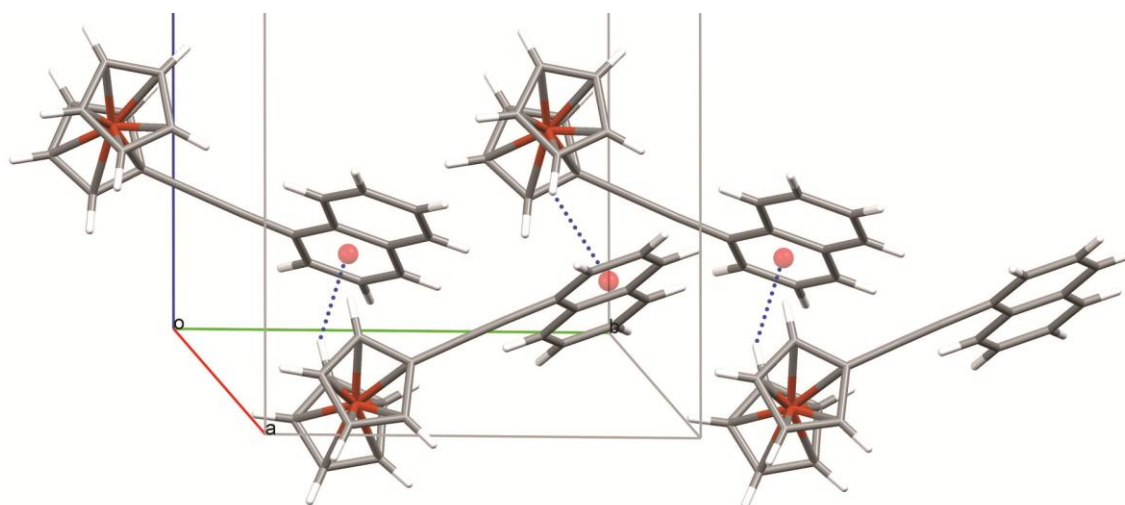

**ESI Fig. 3** Herringbone motif for **I** showing EF CH $\cdots$  $\pi$  from H(7) to Cg3 (2.934 Å).

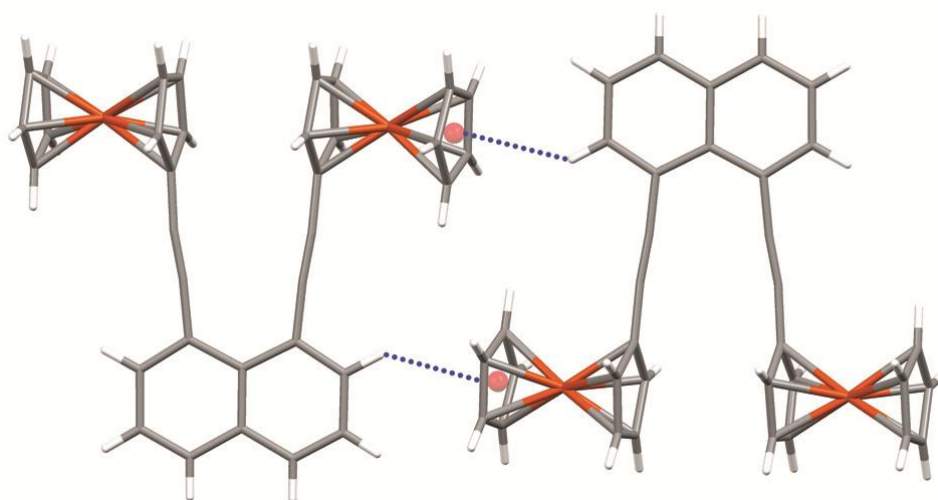

**ESI Fig. 4** Second inversion dimer motif of **II** showing EF CH $\cdots\pi$  from H(32) to Cg2 (2.896 Å).

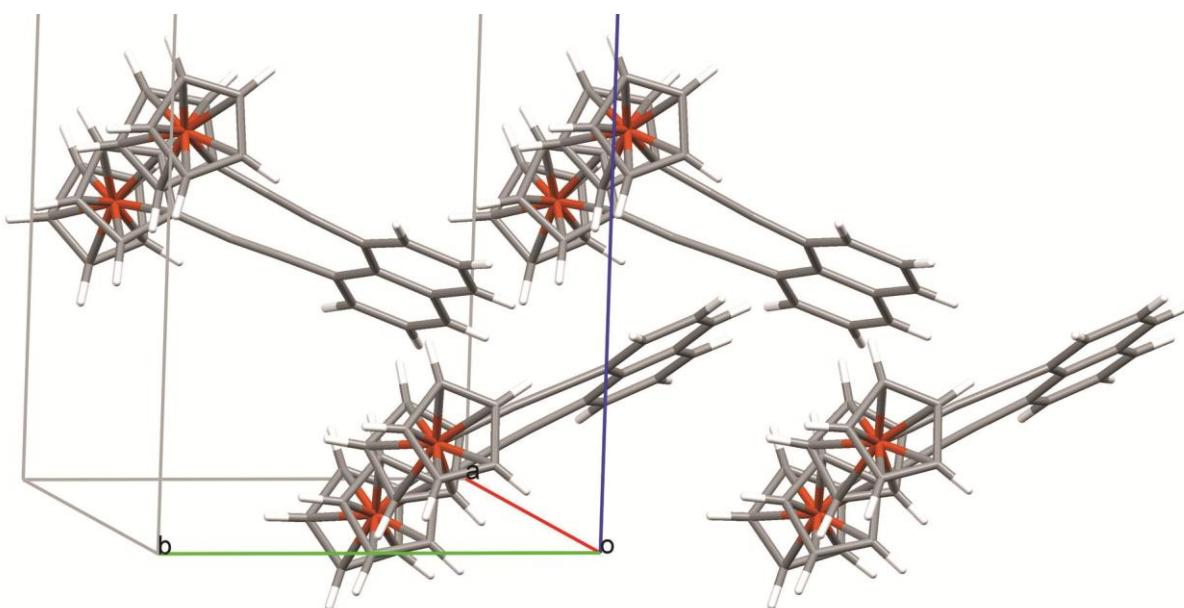

**ESI Fig. 5** Herringbone motif for **II**.

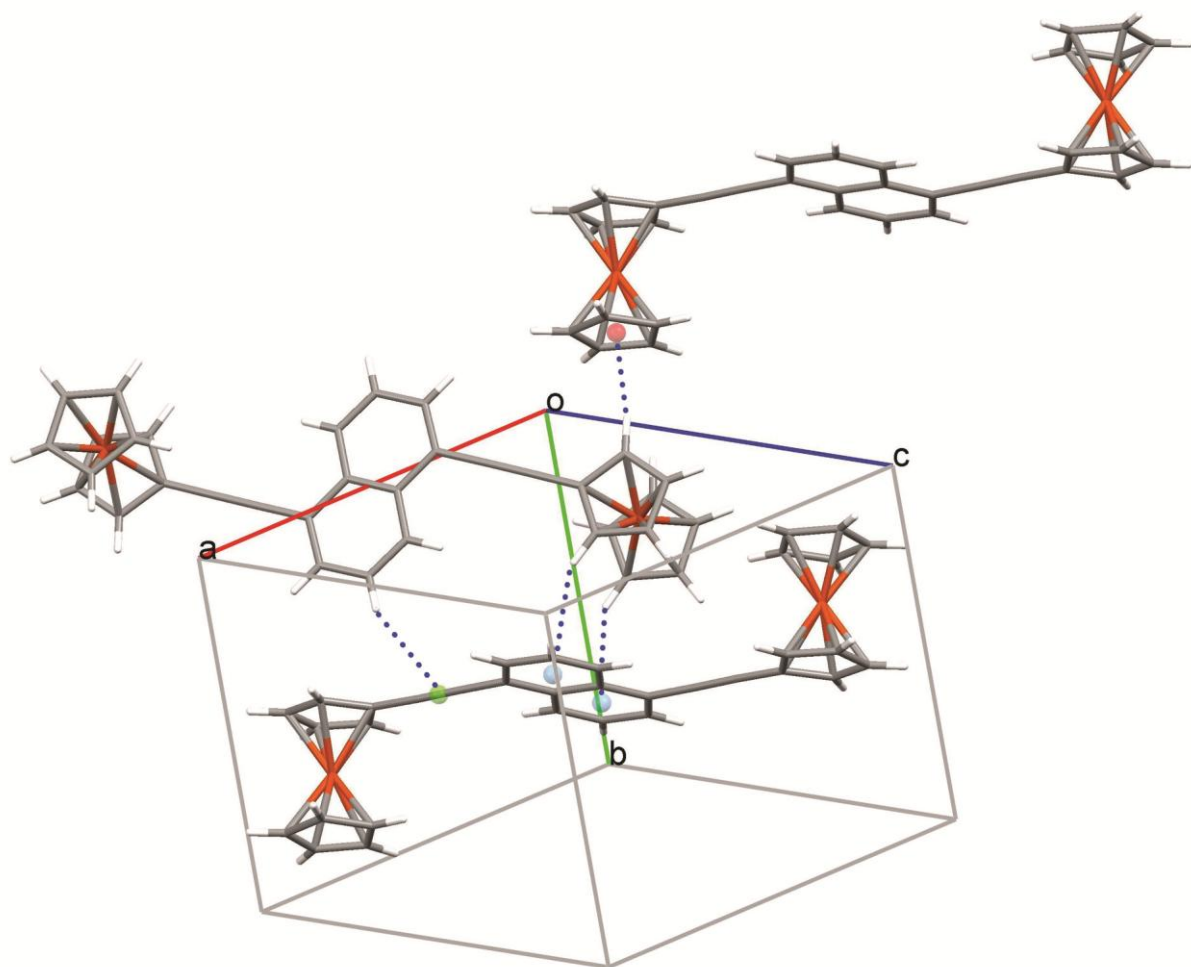

**ESI Fig. 6** Packing of **IIIa**, short contacts (shown dotted) between orthogonal repeat motifs generate 3-dimensional herringbone down *c*

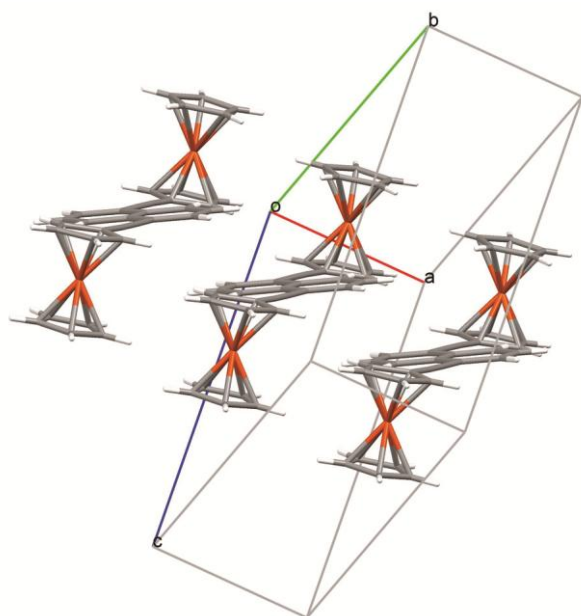

**ESI Fig. 7** Packing of **IIIb**, staircase motif in (0 1 -1)

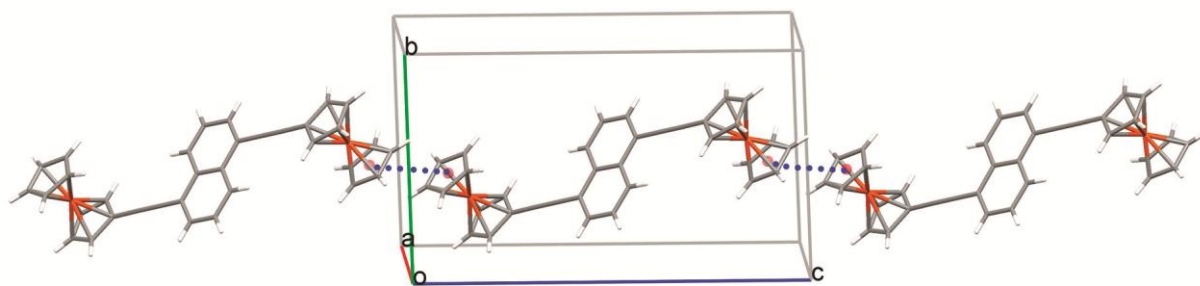

**ESI Fig. 8** Packing of **IIIb**, OFF motif down *c*

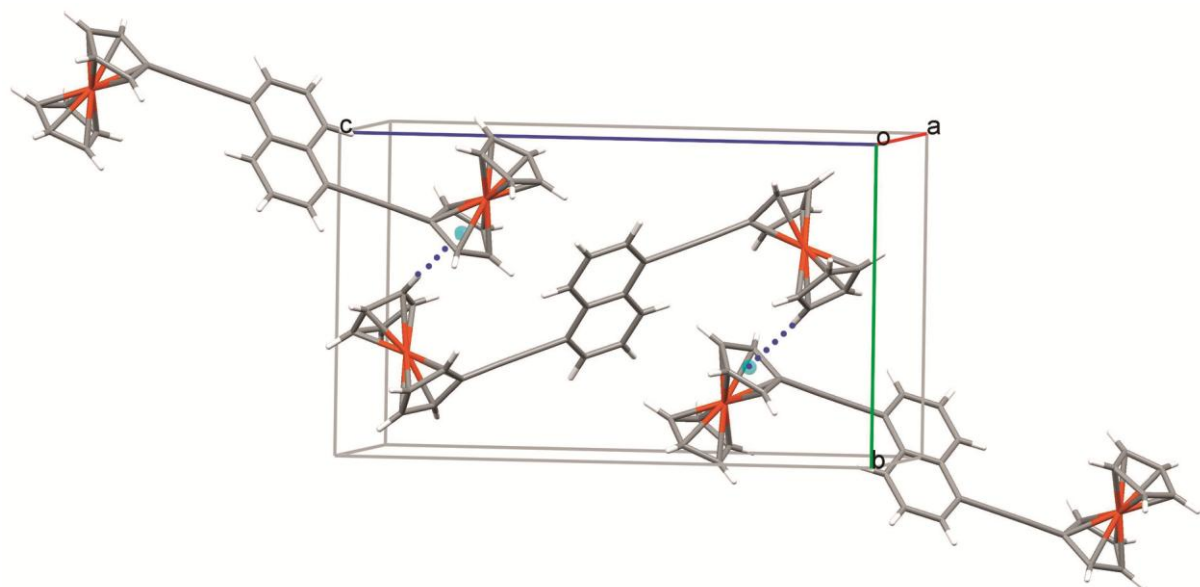

**ESI Fig. 9** Packing of **IIIb**, EF motif that generates sheets in (102)

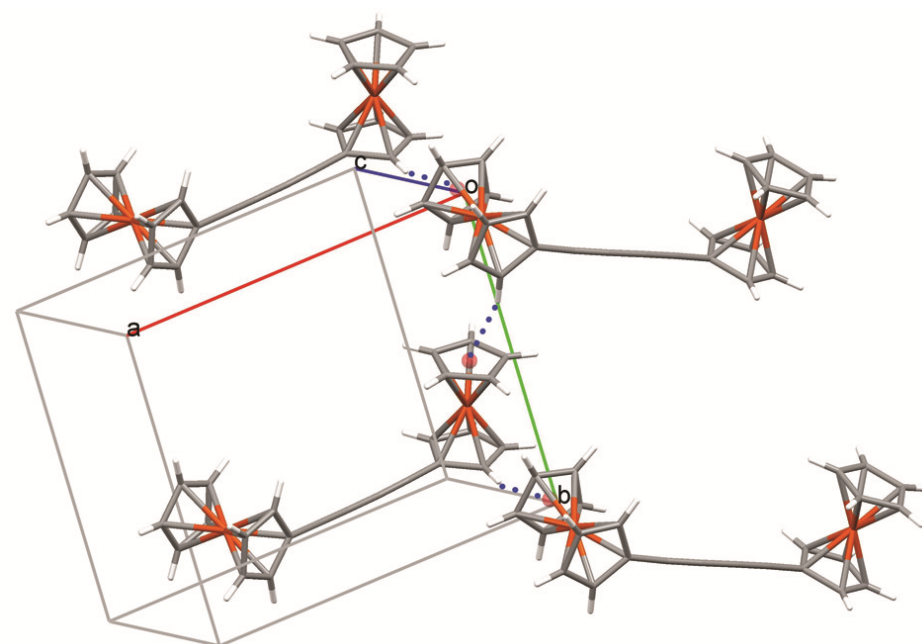

**ESI Fig. 10** Packing of **IV**, EF motif Cp3 H(22) to Cg4 (2.749 Å).
