# Supplementary material for: Probing CH-π(alkyne) interactions in a series of ethynylferrocenes
Source: Royal Society of Chemistry journal article supplement (doi:10.1039/c2ce25267h), 2012-01-01
Supplement: c2ce25267h_2.pdf [file c2ce25267h_2.pdf]

**ESI Table 1** Selected bond lengths (Å) and angles (°) for compounds **I** – **V**<sup>a</sup>

|                                       | <b>I</b>   | <b>II</b>             | <b>IIIa</b> | <b>IIIb</b> | <b>IV</b>         | <b>V</b>            |
|---------------------------------------|------------|-----------------------|-------------|-------------|-------------------|---------------------|
| Fc1/Fc2: average Cp C—C               | 1.418(7)   | 1.415(8)/1.413(9)     | 1.414(7)    | 1.417(12)   | 1.41(2)/1.422(12) | 1.424(6)            |
| Cg1—Fe1/Cg3—Fe2                       | 1.6486(13) | 1.6531(11)/1.6558(11) | 1.6457(16)  | 1.6472(11)  | 1.652(2)/1.651(2) | 1.6447(9)           |
| Cg2—Fe1/Cg4—Fe2                       | 1.6491(13) | 1.6478(11)/1.6519(12) | 1.6488(16)  | 1.6534(12)  | 1.649(2)/1.647(2) | 1.6456(9)           |
| Cp1—Cp2/Cp3—Cp4: dihedral             | 1.2(2)     | 2.72(7)/0.14(9)       | 3.5(3)      | 2.95(18)    | 2.4(4)/1.7(4)     | 2.82(15)            |
| Cp1—Cp2/Cp3—Cp4: torsion              | 2.07(5)    | 5.2(3)/6.4(2)         | 1.70(13)    | 8.3(4)      | 36(2)/6.0(6)      | 1.8(3)              |
|                                       |            |                       |             |             |                   |                     |
| C(1)—C(11)/C(21)—C(13)/C(1)—C(11a)    | 1.458(5)   | 1.425(3)/1.434(3)     | 1.434(6)    | 1.430(3)    | 1.415(8)/1.425(8) | 1.435(15)/1.480(13) |
| C(11)—C(12)/C(13)—C(14)/C(11a)—C(12a) | 1.194(5)   | 1.182(3)/1.177(3)     | 1.196(5)    | 1.189(3)    | 1.205(7)/1.210(7) | 1.246(14)/1.307(12) |
| C(12)—C(adjacent)/C(14)—C(adjacent)   | 1.424(5)   | 1.442(3)/1.442(3)     | 1.441(6)    | 1.433(3)    | 1.370(8)          | 1.50(1)             |
| Cp1—Nap/Cp3—Nap: dihedral             | 85.66(8)   | 78.77(7)/80.95(6)     | 3.1(3)      | 14.46(16)   | -                 | -                   |
| Cp1—Cp3: dihedral                     | -          | 3.99(8)               | -           | -           | 87.2(2)           | 180                 |

<sup>a</sup>**Notation:**

Fc1/Fc2: ferrocenyls containing Fe1 and Fe2 respectively

Cyclopentadienyl rings: Cp1, C(1)···C(5); Cp2, C(6)···C(10); Cp3, C(21)···C(25); Cp4, C(26)···C(30).

Cg1-Cg4: centroid of cyclopentadienyl rings Cp1-Cp4 respectively

Naphthalene ring system: Nap, C(31)···C(40).

C(adjacent): **I**, C(31); **II**, C(31)/C(38); **III**, C(31); **IV**, C(14); **V**, C(12a).
